# Supplementary material
Source: Springer Nature journal article supplement (https://www.springermedizin.de/resource/supplementary/12957_2007_411_MOESM2_ESM.pdf/9564916)
Supplement: MOESM2 [file 9564916]

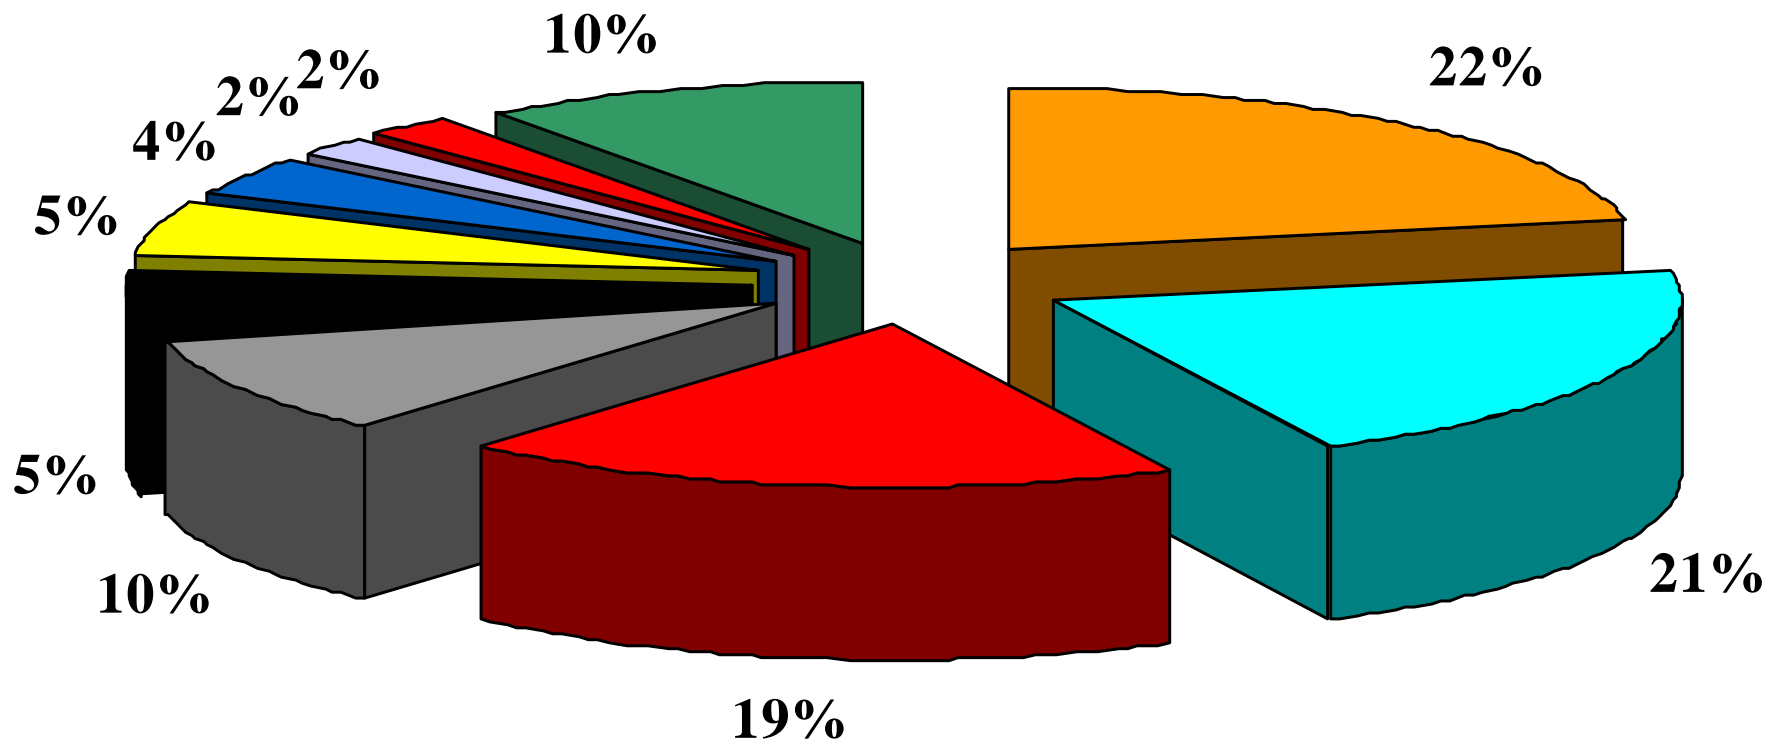

**Normal**

**Lymphoma**

**Hyperplasia**

**SCC**

**Melanoma**

**Adenocarcinoma**

**Granulomatous**

**Fatty**

**Unsatisfactory**

**Other**
